# Supplementary material for: Comparison between Cardiac Output and Pulmonary Vascular Pressure Measured by Indirect Fick and Thermodilution Methods
Source: MDPI journal article supplement (doi:10.3390/jpm13030559), 2023-03-20
Supplement: s1 [file s1]

| No | BSA  | Satura<br>tion<br>PA | Satura<br>tion<br>Aorta | RA - A<br>wave | RA - V wave | RA<br>mean | RV<br>Systolic | RVEDP | PA<br>Systolic | PA<br>Diastolic | PA<br>mean | CPW A<br>wave | CPW V<br>wave | CPW<br>mean | Cardiac<br>Output<br>Thermo | Cardiac<br>Index<br>Thermo | Cardiac<br>Output<br>Fick | Cardiac<br>Index<br>Fick | PVR  | SVR | PVR  | SVR |      |
|----|------|----------------------|-------------------------|----------------|-------------|------------|----------------|-------|----------------|-----------------|------------|---------------|---------------|-------------|-----------------------------|----------------------------|---------------------------|--------------------------|------|-----|------|-----|------|
|    |      |                      |                         |                |             |            |                |       |                |                 |            |               |               |             |                             |                            |                           |                          |      |     |      |     |      |
| 1  | 1.78 |                      |                         |                | 14          | 10         |                | 90    | 11             | 68              | 23         | 43            |               | 22          | 17                          | 3.1                        | 1.72                      | 5.9                      | 3.28 | 5.2 |      | 2.7 |      |
| 25 | 1.94 | 78                   | 94                      | 16             | 16          | 13         |                | 37    | 12             | 37              | 19         | 25            | 19            | 23          | 18                          | 4.6                        | 2.42                      | 8.3                      | 4.37 | 1.6 | 17.6 | 0.9 | 9.7  |
| 52 | 2.30 | 77                   | 96                      | 8              | 6           | 6          |                | 31    | 16             | 28              | 18         | 24            | 15            | 14          | 13                          | 6.1                        | 2.8                       | 10.3                     | 4.6  | 1.8 | 16.4 | 1.1 | 11.6 |
| 3  | 2.49 | 74                   | 96                      |                |             |            |                |       |                | 65              | 26         | 35            | 25            | 25          | 20                          | 3.6                        | 1.50                      | 6                        | 2.50 | 4.2 |      | 2.5 |      |
| 58 | 1.49 | 78.4                 | 96.7                    | 10             | 8           | 7          |                | 38    | 10             | 31              | 10         | 20            | 13            | 15          | 12                          | 3.9                        | 2.6                       | 5.9                      | 4    | 2.0 | 21.7 | 1.3 | 14.1 |
| 15 | 1.52 | 69                   | 95                      | 13             | 10          | 9          |                | 37    | 13             | 41              | 9          | 22            | 17            | 20          | 12                          | 2.8                        | 1.87                      | 4.21                     | 2.81 | 3.6 | 38.3 | 2.3 | 25.0 |
| 54 | 1.97 | 56                   | 96                      | 12             | 9           | 7          |                | 84    | 12             | 86              | 34         | 50            | 25            | 23          | 15                          | 4.6                        | 2.4                       | 6.6                      | 3.4  | 7.6 | 20.5 | 5.3 | 14.2 |
| 13 | 2.29 | 76                   | 95                      | 4              | 3           | 1          |                | 41    | 10             | 31              | 12         | 20            | 13            | 12          | 9                           | 6                          | 2.73                      | 8.6                      | 3.91 | 1.8 | 13.3 | 1.2 | 9.2  |
| 9  | 1.61 | 72                   |                         | 9              | 9           | 7          |                | 50    | 11             | 45              | 16         | 29            | 16            | 27          | 17                          | 3.7                        | 2.31                      | 5.3                      | 3.31 | 3.3 |      | 2.3 |      |
| 19 | 2.01 | 76                   | 100                     | 15             | 17          | 13         |                | 82    | 18             | 86              | 43         | 58            | 38            | 37          | 37                          | 4.7                        | 2.47                      | 6.7                      | 3.53 | 4.5 |      | 3.1 | 16.3 |
| 43 | 1.90 | 82                   | 98                      | 6              | 3           | 2          |                | 37    | 10             | 33              | 13         | 22            | 12            | 14          | 10                          | 5.5                        | 2.9                       | 7.7                      | 4    | 2.2 | 21.0 | 1.6 | 5.1  |
| 12 | 2.08 | 72.7                 | 91                      | 12             | 12          | 8          |                | 48    | 9              | 38              | 14         | 26            | 25            | 29          | 21                          | 5.7                        | 2.85                      | 7.7                      | 3.85 | 2.3 | 22.9 | 1.7 | 16.8 |
| 14 | 1.87 | 80.8                 | 95                      | 13             | 4           | 4          |                | 37    | 4              | 37              | 11         | 22            | 13            | 14          | 10                          | 5.7                        | 3.17                      | 7.7                      | 4.28 | 2.1 |      | 1.6 | 13.0 |
| 32 | 1.82 | 80                   | 98                      | 3              | 1           | -1         |                | 37    | 3              | 36              | 9          | 18            | 10            | 9           | 6                           | 5.2                        | 2.89                      | 6.9                      | 3.83 | 1.5 |      | 1.2 |      |
| 56 | 1.76 | 76                   | 91                      | 9              | 7           | 6          |                | 35    | 11             | 40              | 14         | 25            | 19            | 16          | 14                          | 6                          | 3.5                       | 7.8                      | 4.5  | 1.5 | 13.4 | 1.2 | 10.4 |
| 65 | 2.03 | 79                   | 96                      | 8              | 7           | 5          |                | 33    | 10             | 27              | 11         | 18            | 17            | 16          | 10                          | 6.8                        | 3.4                       | 8.8                      | 4.4  | 1.2 | 15.8 | 0.9 | 12.1 |
| 59 | 1.94 | 57                   | 97                      | 11             | 15          | 10         |                | 41    | 11             | 51              | 20         | 35            | 16            | 28          | 24                          | 2.9                        | 1.5                       | 3.6                      | 1.9  | 3.9 |      | 3.1 | 18.5 |
| 17 | 1.93 | 80                   | 96                      | 8              | 8           | 7          |                | 51    | 11             | 52              | 21         | 34            | 20            | 14          | 12                          | 6.9                        | 3.63                      | 8.5                      | 4.47 | 3.1 | 11.0 | 2.6 | 8.9  |

|    |      |      |      |    |    |    |     |    |     |    |    |    |    |    |     |      |      |      |      |      |      |      |
|----|------|------|------|----|----|----|-----|----|-----|----|----|----|----|----|-----|------|------|------|------|------|------|------|
| 10 | 1.75 | 73.7 | 98   | 10 | 8  | 7  | 33  | 14 | 26  | 5  | 15 | 13 | 10 | 9  | 4.2 | 2.47 | 5    | 2.94 | 1.3  | 1.1  | 16.7 |      |
| 44 | 2.02 | 71   | 98   | 10 | 10 | 7  | 35  | 11 | 31  | 17 | 22 | 24 | 24 | 20 | 3.8 | 2    | 4.5  | 2.3  | 0.4  | 26.5 | 0.4  | 22.5 |
| 18 | 2.11 | 76.5 | 95   |    |    |    | 36  | 10 | 33  | 17 | 24 | 18 | 20 | 13 | 6.6 | 3.30 | 7.8  | 3.90 | 1.8  | 1.5  |      |      |
| 23 | 1.67 | 79   | 97   | 7  | 8  | 5  | 28  | 10 | 20  | 9  | 14 | 13 | 16 | 10 | 6.1 | 3.59 | 7.2  | 4.24 | 0.6  | 12.0 | 0.5  | 10.0 |
| 37 | 1.94 | 78   | 98   | 17 | 9  | 8  | 28  | 11 | 32  | 11 | 17 | 14 | 17 | 13 | 5.2 | 2.70 | 6.1  | 3.21 | 0.8  | 21.5 | 0.7  | 14.5 |
| 5  | 2.43 | 56   | 88   | 32 | 33 | 26 | 100 | 28 | 108 | 41 | 67 | 26 | 37 | 28 | 5.8 | 2.52 | 6.8  | 2.96 | 6.7  | 5.7  |      |      |
| 49 | 1.89 | 62   | 85   |    |    |    |     |    | 45  | 26 | 35 | 14 | 13 | 12 | 6.6 | 3.6  | 7.6  | 4.2  | 3.4  | 3.0  |      |      |
| 48 | 2.28 | 68   | 93   | 16 | 16 | 15 | 48  | 17 | 19  | 18 | 17 | 26 | 32 | 26 | 5.3 | 2.4  | 6.1  | 2.8  | 0.9  | 0.8  |      |      |
| 61 | 1.65 | 70   | 95   | 15 | 13 | 10 | 34  | 17 | 34  | 12 | 22 | 18 | 28 | 16 | 4   | 2.4  | 4.6  | 2.9  | 1.4  | 20.0 | 1.2  | 17.1 |
| 22 | 1.97 | 77   | 95   | 5  | 4  | 3  | 27  | 7  | 23  | 9  | 15 | 12 | 12 | 10 | 6.4 | 3.37 | 7.1  | 3.74 | 0.8  | 16.0 | 0.7  | 14.4 |
| 21 | 1.79 | 64   | 94.6 | 8  | 5  | 5  | 44  | 13 | 43  | 24 | 31 | 17 | 20 | 16 | 3.8 | 2.11 | 4.2  | 2.33 | 3.8  | 40.5 | 3.2  | 36.9 |
| 45 | 1.94 | 70   | 96   | 24 | 16 | 17 | 45  | 23 | 42  | 28 | 35 | 42 | 28 | 35 | 6   | 3.2  | 6.55 | 3.4  | 1.5  | 13.8 | 1.4  | 12.7 |
| 68 | 1.34 | 58   | 90   |    | 26 | 21 | 76  | 26 | 81  | 38 | 58 |    | 48 | 35 | 3.7 | 2.7  | 4    | 2.9  | 8.0  | 36.4 | 7.5  | 33.9 |
| 64 | 2.09 | 67   | 95   | 15 | 16 | 13 | 52  | 18 | 52  | 27 | 38 | 25 | 23 | 22 | 5   | 2.6  | 5.4  | 2.8  | 3.2  | 23.5 | 3.0  | 21.9 |
| 51 | 1.31 | 76.4 | 97.3 | 3  | 4  | 1  | 48  | 7  | 44  | 9  | 24 | 15 | 13 | 9  | 6.2 | 4.6  | 6.54 | 4.9  | 2.4  | 21.2 | 2.3  | 20.0 |
| 2  | 1.62 | 42   | 92   | 23 | 24 | 21 | 81  | 26 | 86  | 48 | 59 | 23 | 23 | 22 | 2.3 | 1.44 | 2.4  | 1.50 | 11.3 | 38.9 | 15.4 |      |
| 16 | 1.59 | 80   | 100  | 9  | 7  | 6  | 39  | 16 | 26  | 15 | 19 | 15 | 16 | 12 | 5.5 | 3.44 | 5.7  | 3.56 | 1.5  | 21.0 | 1.4  | 20.5 |
| 66 | 1.80 | 53   | 88   | 10 | 8  | 7  | 88  | 11 | 90  | 34 | 54 | 12 | 12 | 10 | 3.4 | 2    | 3.5  | 2    | 12.9 | 20.1 | 11.6 | 19.7 |
| 6  | 1.65 | 63   | 92   | 5  | 3  | 2  | 41  | 9  | 43  | 16 | 25 | 13 | 13 | 11 | 5.1 | 3.00 | 5.2  | 3.06 | 2.8  | 2.8  |      |      |
| 4  | 1.59 | 77   | 100  | 5  | 4  | 1  | 28  | 8  | 29  | 13 | 21 | 13 | 17 | 10 | 5.1 | 3.19 | 5.2  | 3.25 | 2.1  | 2.1  |      |      |
| 20 | 2.02 | 68.4 | 97   | 9  | 7  | 7  | 39  | 12 | 39  | 13 | 24 | 13 | 12 | 11 | 5.3 | 2.65 | 5.4  | 2.70 | 2.5  | 15.6 | 2.4  |      |
| 60 | 1.97 | 76   | 97   | 16 | 15 | 12 | 43  | 19 | 34  | 19 | 26 | 21 | 25 | 19 | 5.5 | 2.9  | 5.6  | 2.9  | 1.3  | 18.3 | 1.3  | 18.3 |

|    |      |      |      |    |    |    |     |    |     |    |    |    |    |    |      |      |          |      |      |      |      |      |
|----|------|------|------|----|----|----|-----|----|-----|----|----|----|----|----|------|------|----------|------|------|------|------|------|
| 67 | 1.46 | 75.7 | 98.7 | 10 | 9  | 8  | 47  | 12 | 26  | 12 | 18 | 19 | 29 | 15 | 4.84 | 3.4  | 4.85     | 3.41 | 0.7  | 17.0 | 0.7  | 17.0 |
| 26 | 1.46 | 59   | 98   | 18 | 15 | 15 | 47  | 21 | 46  | 21 | 33 | 28 | 32 | 23 | 4.2  | 2.10 | 4.2      | 2.10 | 2.3  | 20.9 | 2.2  | 20.9 |
| 11 | 1.63 | 79   | 98   |    |    |    |     |    | 28  | 12 | 19 | 13 | 17 | 10 | 6.1  | 3.81 | 6.1      | 3.81 | 1.5  | 13.8 | 1.5  | 13.9 |
| 7  | 1.53 |      |      | 4  | 2  | 1  | 25  | 6  | 23  | 5  | 11 | 10 | 11 | 6  | 4.9  | 3.27 | 4.9      | 3.27 | 1.4  |      | 1.4  |      |
| 27 | 1.95 | 69   | 96   | 5  | 3  | 0  | 29  | 8  | 25  | 5  | 14 | 10 | 8  | 9  | 5.2  | 2.74 | 5.19     | 2.73 | 1.7  | 17.1 | 1.8  | 17.8 |
| 36 | 1.89 | 61   | 97   |    | 21 | 14 | 62  | 11 | 60  | 35 | 42 |    | 26 | 24 | 4.2  | 2.30 | 4.1      | 2.20 | 4.2  | 13.0 | 4.4  |      |
| 8  | 1.84 | 76   | 94   | 9  | 8  | 4  | 42  | 12 | 44  | 19 | 31 | 16 | 16 | 13 | 8    | 4.44 | 7.4      | 4.11 | 2.2  | 8.6  | 2.4  | 9.2  |
| 24 | 2.05 | 48   | 90   | 22 | 21 | 19 | 111 | 27 | 106 | 37 | 60 | 11 | 10 | 9  | 4.9  | 2.45 | 4.5      | 2.25 | 10.4 | 14.6 | 11.4 | 15.9 |
| 31 | 1.53 | 68   | 95   | 21 | 11 | 9  | 37  | 16 | 34  | 17 | 23 | 23 | 19 | 18 | 3.5  | 2.33 | 3.2      | 2.13 | 1.6  | 35.7 | 1.7  | 38.5 |
| 33 | 1.48 | 46   | 76   | 18 | 18 | 16 | 104 | 16 | 109 | 31 | 59 | 16 | 19 | 15 | 3.8  | 2.53 | 3.4      | 2.27 | 11.8 | 22.3 | 12.9 |      |
| 42 | 2.27 | 56   | 92   | 24 | 28 | 22 | 86  | 32 | 90  | 37 | 52 | 25 | 22 | 24 | 5.3  | 2.4  | 4.6<br>5 | 2.11 | 5.3  |      | 3.4  |      |
| 35 | 1.77 | 76   | 97   | 7  | 6  | 4  | 32  | 12 | 26  | 9  | 16 | 16 | 19 | 12 | 5.8  | 3.41 | 4.5      | 2.65 | 0.7  | 25.3 | 0.5  | 15.9 |
| 30 | 1.47 | 78   | 100  | 10 | 18 | 10 | 59  | 14 | 55  | 27 | 37 | 22 | 27 | 20 | 4.5  | 3.00 | 3.3      | 2.20 | 3.8  | 26.3 | 5.2  | 35.8 |
| 29 | 1.94 | 72   | 98   | 15 | 16 | 13 | 43  | 14 | 40  | 18 | 29 | 21 | 34 | 22 | 4.9  | 2.58 | 3.3      | 1.74 | 1.4  | 21.3 | 2.0  | 31.9 |
| 28 | 1.57 | 66   | 98   | 3  | 5  | 1  | 49  | 6  | 55  | 25 | 38 | 30 | 34 | 26 | 3.8  | 2.57 | 2.5      | 1.69 | 3.2  | 32.4 | 4.6  | 49.2 |
